# Supplementary material for: IL-1β priming triggers an adaptive stress response that enhances pancreatic β-cell resilience to subsequent cytotoxic inflammatory insult
Source: Research Square preprint supplement (doi:10.21203/rs.3.rs-6378229/v1), 2025-04-28
Supplement: Supplementary file 1 [file 1b0193ae1bb9c0d2c88e6f67.docx]

**Supplementary Information (SI)**

***Cell Death and Differentiation***

**IL-1β priming triggers an adaptive stress response that enhances pancreatic β-cell resilience to subsequent cytotoxic inflammatory insult**

Carolina Sétula1,2, Andrea Scelza-Figueredo1,2, Ingrid Pensado-Evans*1,2, Miranda Sol Orellano*1,2, Ignacio Rodríguez-Valero1,2, Eduardo Spinedi3, Raghavendra G. Mirmira4,, Luz Andreone1,2 and Marcelo Javier Perone1,2‡

1 Immuno-Endocrinology, Diabetes & Metabolism Laboratory, Instituto de Investigaciones en Medicina Traslacional (IIMT), CONICET-Universidad Austral, Pilar, Argentina.

2 Facultad de Ciencias Biomédicas, Universidad Austral, Pilar, Argentina.

3 Centre of Experimental and Applied Endocrinology (CENEXA, UNLP-CONICET), La Plata Medical School, Universidad Nacional de La Plata, Argentina.

4 Department of Medicine and the Kovler Diabetes Center, The University of Chicago, Chicago, Illinois, USA.

**Supplementary Table 1. Primer sequences for qPCR**

**
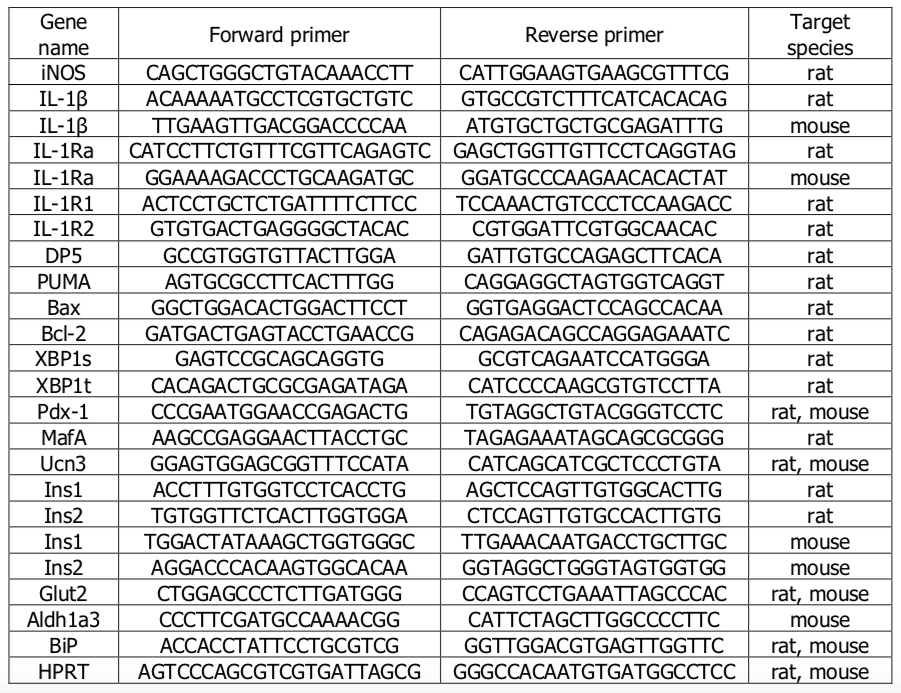
**


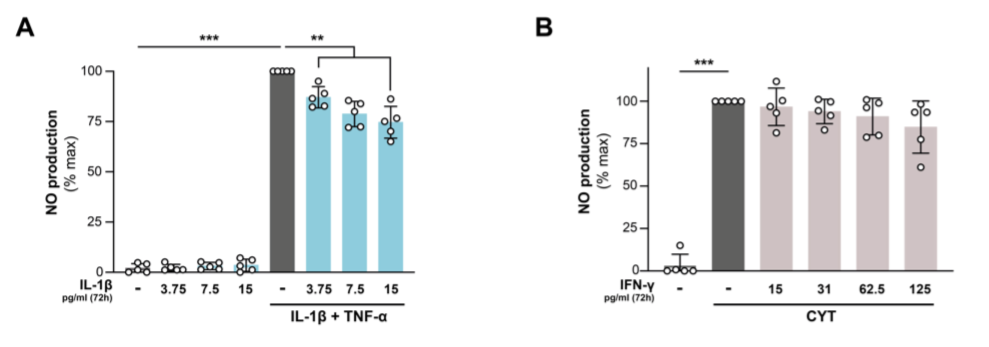


**Supplementary Figure 1: A.** INS-1E cells were treated for 72 h with IL-1β (3.75, 7.5 or 15 pg/ml as indicated) and subsequently challenged or not with IL-1β 100 pg/ml + TNF-α 8 ng/ml for 16 h, n=5.

**B.** INS-1E cells were treated for 72 h with IFN-γ (15, 31, 62.5 or 125 pg/ml as indicated) and subsequently challenged or not with or IL-1β 100 pg/ml + IFN-γ 5 ng/ml (CYT) for 16 h, n=5. NO levels in the conditioned media were assessed by Griess reaction and normalized to total cell protein content. Data are shown as mean ± SD. (**) p < 0.01, (***) p < 0.001


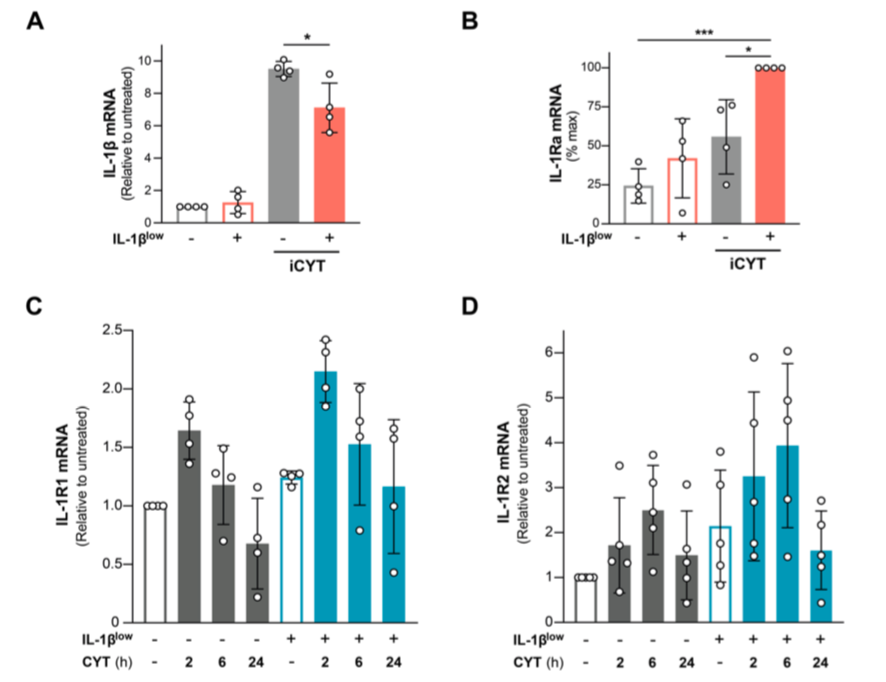


**Supplementary Figure 2: A-B.** Murine islets (50 IEQ/well) were conditioned for 72 h with IL-1β 10 pg/ml (IL-1βlow) and subsequently challenged or not with IL-1β 100 pg/ml + IFN-γ 5 ng/ml + TNF-α 8 ng/mL (iCYT) for 16h. **A.** *IL-1β* mRNA and **B.** *IL-1Ra* mRNA expression were analyzed by RT-qPCR. Relative mRNA levels normalized to *HPRT*, n=4. **C-D.** INS-1E cells were conditioned for 72 h with IL-1β 10 pg/ml (IL-1βlow) and subsequently challenged or not with IL-1β 100 pg/ml + IFN-γ 5 ng/ml (CYT) for the indicated times. **C.** *IL-1R1* mRNA and **D.** *IL-1R2* mRNA expression were analyzed by RT-qPCR. Relative mRNA levels normalized to *HPRT*, n=4-5. Data are shown as mean ± SD. Experiments were performed independently at least 4 times. (*) p < 0.05, (***) p < 0.001.
